# Supplementary material for: Nitrogen deposition and climate drive plant nitrogen uptake while soil factors drive nitrogen use efficiency in terrestrial ecosystems
Source: Copernicus journal article supplement (doi:10.5194/esd-16-1183-2025), 2025-07-28
Supplement: Supplementary file 1 [file Table S1.xlsx]

## Sheet: Full 1 - Table S1. Gapfilled da
Table S1. Gapfilled database comprehendeing the data used for this study. Citations based on DB.origen: “scrapping” and “Jakub” category is detailed in id-intern, Tian = 64,65, Bauters = 66,67, Ces = 68, BIOfor-FACE= Unpublished data from BIOfor FACE experiment. N is displayed in % of dry weight. NPP = Net primary production in kg/ha/yr.
DB.origen	id_intern	Latitude	Longitude	Forest_type	Leaf_N	Wood_N	Root_N	Litter_N	Leaf_NPP	Wood_NPP	Root_NPP	Litter_NPP	Nstock_leaves	Nstock_wood	Nstock_roots	Nstock_litter	MAT	MAP	Altitude	Gross_Nuptake	Reabsorved	Net_Nuptake	Stand_age	Stand_density	Soil_CEC	Soil_ph	Soil_N	Soil_CN	Myco.type	AM_percent	MAT_wc	MAP_wc	Alt_wc	Soil_CN_sg	Soil_ph_sg	woodiness	MAT_MAP_wc	AM_map	N_stocks_sg	Bact	Fung	Nlimit	mic_C	mic_N	N	BD	soil_N_combi	soil_BD_sg	N_stocks_combi
Tian	plot2	23.2	112.5	Broadleaved	2.04583	1.21117	1.08736	NA	560	5720	1420	NA	11.4566	69.2786	15.4405	NA	21	1996	200	96.1757	NA	NA	NA	NA	NA	NA	NA	NA	NA	NA	20.4542	1819	341	1.05394	51.0501	Woody	37213.7	0	0.493376	2.79285	1.04339	-0.259564	104.058	15.6168	294.784	111.581	294.784	111.581	0.493386
Tian	plot4	30.7	103.5	Broadleaved	2.40987	1.11639	1.20135	NA	3200	2880	780	NA	77.116	32.1521	9.37054	NA	15.2	1244	750	118.639	NA	NA	NA	NA	NA	NA	NA	NA	NA	NA	16.0042	1165	657	0.916365	66.8025	Woody	18630.3	0	0.655815	2.7213	1.43438	-0.163161	80.0125	12.1811	350.328	124.803	350.328	124.803	0.655828
Tian	plot5	34.1	107.7	Broadleaved	2.31324	0.820504	1.23638	NA	2840	5920	1660	NA	65.696	48.5738	20.524	NA	11.8	734	1129	134.794	NA	NA	NA	NA	NA	NA	NA	NA	NA	NA	9.67083	714	1256	1.17158	62.4868	Woody	6913.9	0	0.633913	2.6581	1.20448	0.019848	71.8938	7.75433	360.068	117.438	360.068	117.438	0.634285
Tian	plot6	36.2	118.6	Broadleaved	2.49272	0.852346	1.41	NA	2740	4700	960	NA	68.3004	40.0602	13.536	NA	10.8	845.9	309	121.897	NA	NA	NA	NA	NA	NA	NA	NA	NA	NA	9.825	804	770	1.27091	68.1045	Woody	7906	0.590611	0.465849	2.30515	0.997411	NA	98.3208	13.3154	246.167	126.298	246.167	126.298	0.466354
Tian	plot7	36.2	120.6	Broadleaved	2.68038	0.875455	1.51784	NA	2740	4700	960	NA	73.4424	41.1464	14.5712	NA	11.9	743.3	294	129.16	NA	NA	NA	NA	NA	NA	NA	NA	NA	NA	9.72083	777	645	1.35022	63.3657	Woody	7556.33	NA	0.445968	NA	NA	-0.00780495	NA	NA	239.167	124.342	239.167	124.342	0.446075
Tian	plot8	36.2	120.6	Broadleaved	2.25	0.856667	1.34333	NA	2740	4700	960	NA	61.65	40.2633	12.896	NA	11.9	743.3	300	114.809	NA	NA	NA	NA	NA	NA	NA	NA	NA	NA	9.72083	777	645	1.35022	63.3657	Woody	7556.33	NA	0.445968	NA	NA	-0.00780495	NA	NA	239.167	124.342	239.167	124.342	0.446075
Tian	plot16	31.6	115.8	Broadleaved	1.223	0.36	0.524	NA	3300	3720	1300	NA	40.359	13.392	6.812	NA	14.2	1177.5	400	60.563	NA	NA	NA	NA	NA	NA	NA	NA	NA	NA	15.55	1230	152	1.03556	59.6898	Woody	19116.2	0	0.361747	2.6325	1.22758	-0.237644	50.4168	10.831	193.713	124.49	193.713	124.49	0.361731
Tian	plot20	27.1	117.3	Broadleaved	1.809	0.36	0.387	NA	10180	4600	1360	NA	184.156	16.56	5.2632	NA	12.7	2204.4	1330	205.979	NA	NA	NA	NA	NA	NA	NA	NA	NA	NA	17.7458	1759	373	1.59122	50.0972	Woody	31251.6	0	0.382493	3.21117	1.50937	-0.2808	31.4571	5.99981	200.402	127.453	200.402	127.453	0.383128
Tian	plot21	27	118.1	Broadleaved	1.476	0.36	0.462	NA	6620	18720	4640	NA	97.7112	67.392	21.4368	NA	14.8	1952	870	186.54	NA	NA	NA	NA	NA	NA	NA	NA	NA	NA	18.3667	1722	330	1.54917	51.2901	Woody	31670.4	0	0.360537	2.45164	1.32273	-0.297319	47.3055	9.23782	192.029	125.183	192.029	125.183	0.360582
Tian	plot22	34.55	105.88	Broadleaved	1.59	0.36	0.483	NA	3620	6480	1300	NA	57.558	23.328	6.279	NA	8.9	564.1	1625	87.165	NA	NA	NA	NA	NA	NA	NA	NA	NA	NA	11.775	616	1114	NA	NA	Woody	7253.4	0.174362	NA	2.35626	0.960618	-0.02184	63.7867	9.05453	NA	NA	NA	NA	NA
Tian	plot23	34.6	103.5	Broadleaved	1.058	0.36	0.447	NA	4800	4380	1740	NA	50.784	15.768	7.7778	NA	1	741.1	3280	74.3298	NA	NA	NA	NA	NA	NA	NA	NA	NA	NA	4.57083	583	2618	1.20853	73.884	Woody	2657.51	1	0.742458	2.97388	1.20127	NA	87.5878	11.0324	413.061	119.866	413.061	119.866	0.742678
Tian	plot26	22.68	108.31	Broadleaved	1.414	0.36	0.448	NA	3060	18960	1520	NA	43.2684	68.256	6.8096	NA	21.6	1372.8	346	118.334	NA	NA	NA	NA	NA	NA	NA	NA	NA	NA	21.3958	1457	157	0.938244	54.07	Woody	31179.8	0	0.382694	2.0305	1.01467	NA	79.6478	12.0422	217.268	117.386	217.268	117.386	0.382564
Tian	plot28	25.9	110.1	Broadleaved	1.328	0.36	0.216	NA	8280	14240	3360	NA	109.958	51.264	7.2576	NA	18.5	1507.8	500	168.48	NA	NA	NA	NA	NA	NA	NA	NA	NA	NA	16.5792	1574	545	1.01204	55.9458	Woody	26102.2	0	0.717799	3.18936	1.60468	-0.253374	66.8531	11.3768	414.25	115.52	414.25	115.52	0.717809
Tian	plot34	31.7	110.6	Broadleaved	1.729	0.36	0.352	NA	8180	5760	1280	NA	141.432	20.736	4.5056	NA	8.1	1400.7	1827	166.674	NA	NA	NA	NA	NA	NA	NA	NA	NA	NA	11.1167	1168	1406	1.18966	58.5379	Woody	12994	0	0.673674	2.91991	1.06393	-0.105244	58.6403	12.1756	380.663	117.97	380.663	117.97	0.6736
Tian	plot41	27.58	114.58	Broadleaved	0.97	0.36	0.45	NA	160	5420	1120	NA	1.552	19.512	5.04	NA	16.75	1590.9	220	26.104	NA	NA	NA	NA	NA	NA	NA	NA	NA	NA	16.8917	1539	227	1.44782	54.0042	Woody	25983.4	0	0.458189	2.46179	1.44024	-0.303551	73.6619	25.6458	255.143	119.777	255.143	119.777	0.458404
Tian	plot45	31.09	103.14	Broadleaved	0.8	0.36	0.39	NA	3980	4140	840	NA	31.84	14.904	3.276	NA	10.9	1100	2750	50.02	NA	NA	NA	NA	NA	NA	NA	NA	NA	NA	2.8375	802	3549	1.32819	58.8825	Woody	2272.33	0.0168724	0.97675	3.07723	1.31735	0.289278	124.024	18.0152	613.742	106.103	613.742	106.103	0.976797
Tian	plot50	41.36	85.94	Broadleaved	1.394	0.36	0.319	NA	2000	3620	480	NA	27.88	13.032	1.5312	NA	9.6	51.1	925	42.4432	NA	NA	NA	NA	NA	NA	NA	NA	NA	NA	11.4625	54	891	0.49497	81.228	Woody	619.65	0.674997	0.382099	2.24343	0.957534	NA	133.797	31.6976	180.573	141.068	180.573	141.068	0.382095
Tian	plot53	25.15	102.78	Broadleaved	0.578	0.36	0.221	NA	4800	12060	2520	NA	27.744	43.416	5.5692	NA	13.8	1030	1960	76.7292	NA	NA	NA	NA	NA	NA	NA	NA	NA	NA	14.5375	913	1972	1.49245	61.3113	Woody	13268.9	0.100635	0.453962	2.59766	0.96538	-0.12512	51.3306	8.63848	245.138	123.427	245.138	123.427	0.45385
Tian	plot54	24.55	101.03	Broadleaved	1.666	0.36	0.471	NA	2460	6480	2840	NA	40.9836	23.328	13.3764	NA	10.7	1841	2500	77.688	NA	NA	NA	NA	NA	NA	NA	NA	NA	NA	12.9375	976	2513	1.60345	56	Woody	12631.1	0	0.661134	3.24756	1.32289	-0.0570818	59.0815	8.09653	416.688	105.794	416.688	105.794	0.661246
Ces	Duke	35.91	-79.1	Coniferous	1.168	0.121132	0.854833	0.557261	5514.57	7724.33	993.89	5484.37	64.1544	9.35319	8.52588	30.5859	NA	NA	NA	82.0335	33.5685	48.465	NA	NA	NA	NA	NA	NA	ECM	0	15.075	1169	140	1.36359	51.7809	Woody	17632.4	0	0.415248	3.03715	0.994227	-0.24489	60.8276	11.5201	190.925	144.996	190.925	144.996	0.41525
Ces	ORNL	35.98	-84.38	Broadleaved	1.61027	0.186	0.899209	0.823234	4962.77	12869.2	3638.31	4615.38	79.9061	23.9367	32.9633	37.9574	NA	NA	NA	136.806	41.9488	94.8573	NA	NA	NA	NA	NA	NA	AM	100	13.9708	1244	241	1.4741	55.5092	Woody	17374.5	0	0.459674	3.15015	1.07057	-0.25609	94.4789	15.1737	230.861	132.887	230.861	132.887	0.460175
Ces	POP-EURO	42.42	12.09	Broadleaved	2.66993	0.718531	1.02135	1.42111	5869.83	23530.5	1731.19	5869.83	156.905	170.774	17.5608	86.3743	NA	NA	NA	345.24	70.5303	274.71	NA	NA	NA	NA	NA	NA	ECM/AM	50	14.0208	296	300	1.24114	70.0776	Woody	4146.47	0	0.431384	2.55453	1.0367	NA	92.8575	16.728	211.641	136.031	211.641	136.031	0.431846
Ces	RHI	45.61	-89.4	Broadleaved	2.11234	0.305961	1.35647	1.09917	3042.46	4049.65	533.278	1989.47	64.7271	11.899	7.06328	21.9466	NA	NA	NA	83.6894	42.7805	40.9089	NA	NA	NA	NA	NA	NA	ECM/AM	50	4.61667	788	496	0.984436	50.0074	Woody	3618.23	0.153122	0.911954	3.03427	1.15915	NA	160.933	22.5257	510.068	119.314	510.068	119.314	0.912874
Bauters	63yrs1	0.293514	25.2958	Broadleaved	2.79371	0.436001	2.226	1.89533	7264.47	1243.16	1791.04	7264.47	202.948	5.4202	39.8686	137.686	24.95	1666	427.512	248.237	65.2621	182.975	60	NA	NA	NA	0.225	NA	AM	NA	24.7083	1744	449	1.2055	46.6322	Woody	43076.8	1	0.350824	1.96451	0.822821	-0.308419	100.442	15.4032	190.975	122.458	0.225	117	0.000394875
Bauters	63yrs2	0.294866	25.2904	Broadleaved	2.94529	0.348116	2.4175	1.88467	6852.06	1447.73	2493.88	6852.06	201.813	5.03977	60.2895	129.138	24.95	1666	449.377	267.142	72.6744	194.468	60	NA	NA	NA	0.108	NA	AM	100	24.7125	1745	450	1.31989	46.8588	Woody	43101.5	1	0.347328	1.96015	0.822296	-0.297561	100.442	15.4032	190.293	121.708	0.108	100	0.000162
Bauters	63yrs3	0.290531	25.2909	Broadleaved	3.07161	0.364677	2.424	2.12333	9815.9	1194.13	2335.37	9815.9	301.506	4.35472	56.6093	208.424	24.95	1666	439.257	362.47	93.0818	269.388	60	NA	NA	NA	0.099	NA	AM	100	24.7125	1742	447	1.36524	46.3792	Woody	43056.4	1	0.342794	1.96159	0.822341	-0.297981	100.442	15.4032	185.23	123.366	0.099	111	0.000164835
Bauters	OG1	0.294239	25.3019	Broadleaved	2.99931	0.384732	2.20533	1.89533	11081.2	1530.94	2422.14	11081.2	332.361	5.89003	53.4163	210.026	24.95	1666	456.989	391.667	122.335	269.333	150	NA	NA	NA	0.225	NA	AM	100	24.6167	1751	469	1.15153	47.509	Woody	43133	1	0.337526	1.96886	0.823347	-0.31786	100.442	15.4032	186.019	120.969	0.225	117	0.000394875
Bauters	OG2	0.293321	25.302	Broadleaved	3.04174	0.361497	2.44067	1.88467	11149.3	655.727	2213.66	11149.3	339.131	2.37043	54.0281	210.126	24.95	1666	458.943	395.529	129.005	266.525	150	NA	NA	NA	0.108	NA	AM	100	24.6167	1751	469	1.15153	47.509	Woody	43133	1	0.337526	1.96886	0.823347	-0.31786	100.442	15.4032	186.019	120.969	0.108	100	0.000162
Bauters	OG3	0.293242	25.3063	Broadleaved	2.93922	0.374675	2.86533	2.12333	11205.1	1731.41	2027.49	11205.1	329.342	6.48715	58.0944	237.921	24.95	1666	489.775	393.923	91.4204	302.503	150	NA	NA	NA	0.099	NA	AM	100	24.6167	1751	469	1.15153	47.509	Woody	43133	1	0.337526	1.96886	0.823347	-0.31786	100.442	15.4032	186.019	120.969	0.099	111	0.000164835
Scrapping	https://doi.org/10.1007/s00442-009-1561-0 , https://doi.org/10.1016/j.foreco.2003.11.011	35.3	135.72	Broadleaved	2.24	0.78	1.702	1.485	3940	3015	4252	3940	88.256	23.517	72.369	58.509	10.5	2495	700	184.142	29.747	154.395	NA	1571	NA	4.289	NA	16.425	ECM	0	11.1792	1893	634	1.72215	48	Woody	21154.3	0	0.734837	3.28946	1.46958	-0.256551	147.453	24.9898	541.636	90.4917	541.636	90.4917	0.735204
Scrapping	https://doi.org/10.1007/978-3-642-57219-7	64.2167	19.5	Mixed forest	NA	NA	NA	NA	NA	NA	NA	NA	NA	NA	NA	NA	1	588	175	NA	NA	31	180	910	75	4.45	0.07	32	ECM	0	1.9625	577	186	2.88152	48.3481	Woody	1139.58	0	0.846958	3.90956	2.2021	0.225918	534.939	86.9302	656.461	86.0187	0.07	86.0187	9.03e-05
Scrapping	https://doi.org/10.1007/978-3-642-57219-7	56.5308	13.1808	Coniferous	NA	NA	NA	NA	NA	NA	NA	NA	NA	NA	NA	NA	7.6	1237	100	NA	NA	98	31	2285	88	4.01	0.17	25	ECM	0	7.14583	966	54	1.49843	51.6305	Woody	6914.95	0	0.854722	3.5067	1.66211	0.077207	260.336	49.8702	501.658	113.821	0.17	113.821	0.000290242
Scrapping	https://doi.org/10.1007/978-3-642-57219-8	56.4833	8.4	Coniferous	NA	NA	NA	NA	NA	NA	NA	NA	NA	NA	NA	NA	7.5	903	27	NA	NA	72	76	735	63	3.39	0.07	39	ECM	0	8.35833	860	35	2.55313	52.1557	Woody	7188.17	0	0.607027	2.9982	1.47078	0.111747	0	0	437.385	92.5243	0.07	92.5243	9.72e-05
Scrapping	https://doi.org/10.1007/978-3-642-57219-9	55.9667	12.25	Broadleaved	NA	NA	NA	NA	NA	NA	NA	NA	NA	NA	NA	NA	7.5	632	45	NA	NA	99	118	400	61	4.07	0.12	21	ECM	0	7.82083	588	16	1.04108	63.8832	Woody	4596.2	0	0.791249	2.79514	1.23489	0.0842535	NA	NA	426.973	123.01	0.12	123.01	0.000221419
Scrapping	https://doi.org/10.1007/978-3-642-57219-7	50.5833	13.25	Coniferous	NA	NA	NA	NA	NA	NA	NA	NA	NA	NA	NA	NA	5.9	935	775	NA	NA	74	58	616	196	3.47	0.39	29	ECM	0	5.625	933	784	1.23416	52.4083	Woody	5263.68	0.0243854	0.954156	3.00037	1.21144	0.094658	115.942	20.248	533.957	118.918	0.39	118.918	0.000695668
Scrapping	https://doi.org/10.1007/978-3-642-57219-7	50.55	13.4667	Broadleaved	NA	NA	NA	NA	NA	NA	NA	NA	NA	NA	NA	NA	5.9	935	750	NA	NA	98	79	568	130	3.39	0.38	20	ECM	0	6.54167	891	659	1.31551	53.3913	Woody	5850.9	0.523115	0.705201	2.91671	1.14974	0.0343101	115.942	20.248	472.288	99.4549	0.38	99.4549	0.000566893
Scrapping	https://doi.org/10.1007/978-3-642-57219-7	50.02	11.8833	Coniferous	NA	NA	NA	NA	NA	NA	NA	NA	NA	NA	NA	NA	5.5	890	700	NA	NA	96	142	363	299	3.52	0.24	26	ECM	0	5.46667	1149	812	1.54171	46.6781	Woody	6271.62	0	0.81618	3.21058	1.23517	0.0625447	125.779	21.5242	578.306	94.0575	0.24	94.0575	0.000338607
Scrapping	https://doi.org/10.1007/978-3-642-57219-7	50.0667	11.8333	Broadleaved	NA	NA	NA	NA	NA	NA	NA	NA	NA	NA	NA	NA	5.5	890	850	NA	NA	79	120	372	402	3.99	0.76	20	ECM	0	5.52083	1155	801	1.55015	46	Woody	6391	0	0.788301	3.09728	1.19106	0.0395826	125.779	21.5242	569.152	92.391	0.76	92.391	0.00105326
Scrapping	https://doi.org/10.1007/978-3-642-57219-7	48.2	7.18333	Coniferous	NA	NA	NA	NA	NA	NA	NA	NA	NA	NA	NA	NA	5.4	1192	1050	NA	NA	42	92	568	116	3.71	0.23	16	ECM	0	7.02083	1282	816	1.33904	48.5177	Woody	8995.37	0.286867	0.831841	3.17263	1.39608	-0.0249149	128.349	20.3719	617.285	89.8431	0.23	89.8431	0.000309959
Scrapping	https://doi.org/10.1007/978-3-642-57219-7	48.2	7.18333	Broadleaved	NA	NA	NA	NA	NA	NA	NA	NA	NA	NA	NA	NA	5.4	1192	1000	NA	NA	61	161	352	170	3.57	0.52	17	ECM	0	7.02083	1282	816	1.33904	48.5177	Woody	8995.37	0.286867	0.831841	3.17263	1.39608	-0.0249149	128.349	20.3719	617.285	89.8431	0.52	89.8431	0.000700776
Scrapping	https://doi.org/10.1007/978-3-642-57219-7	41.8667	13.6333	Broadleaved	NA	NA	NA	NA	NA	NA	NA	NA	NA	NA	NA	NA	6.4	1109	1560	NA	NA	85	104	885	233	5.69	0.73	12	ECM	0	9.7875	836	961	1.34773	73.6844	Woody	8192.8	0	0.645183	2.91239	1.18124	NA	96.0874	17.1797	326.444	132.024	0.73	132.024	0.00144567
Scrapping	https://doi.org/10.1007/978-3-642-57219-7	41.75	14.8833	Coniferous	NA	NA	NA	NA	NA	NA	NA	NA	NA	NA	NA	NA	8.5	1032	905	NA	NA	72	37	1197	381	6.92	0.42	10	ECM	0	13.6167	474	465	0.935306	68.6494	Woody	6458.25	0	0.557488	2.32561	0.99741	-0.30108	127.479	18.3485	303.909	122.479	0.42	122.479	0.00077162
Scrapping	https://doi.org/10.1016/j.foreco.2004.03.033 and https://doi.org/10.1002/ecm.1423	42.5	-72.16	Coniferous	1.15	0.173721	1.6	0.6	3100	2778.5	3490	3100	35.65	4.82683	55.84	18.6	7.4	1066	315	96.3168	17.05	79.2668	100	NA	NA	NA	NA	43.6	ECM	0	7.17917	1094	299	1.84475	45	Woody	7849.45	0	1.46039	3.63847	2.28813	-0.019654	156.643	22.6518	880.503	110.586	880.503	110.586	1.46057
Scrapping	https://doi.org/10.1016/j.foreco.2004.03.033 and https://doi.org/10.1002/ecm.1424	42.5	-72.16	Broadleaved	2.1	0.36	1.2	0.9	2910	4542.8	2520	2910	61.11	16.3541	30.24	26.19	7.4	1066	315	107.704	34.92	72.7841	100	NA	NA	NA	NA	40.1	ECM/AM	50	7.17917	1094	299	1.84475	45	Woody	7849.45	0	1.46039	3.63847	2.28813	-0.019654	156.643	22.6518	880.503	110.586	880.503	110.586	1.46057
Scrapping	https://doi.org/10.1890/10-1558.1 and https://doi.org/10.1002/ecy.2193	9.10861	-79.8436	Broadleaved	2.48	0.36	1.43	1.3	6830	2260	4752.95	6830	169.384	8.136	67.9672	88.79	26	2600	NA	245.487	80.594	164.893	200	NA	NA	NA	NA	NA	AM	100	26.3417	2402	89	1.4106	52.5246	Woody	63272.7	0.425006	0.820758	3.49862	0.913232	-0.301252	269.327	38.2894	507.549	107.698	507.549	107.698	0.819935
Scrapping	https://doi.org/10.1111/1365-2435.13660 , https://doi.org/10.3389/fpls.2019.00664 , https://doi.org/10.1038/nclimate3235 ,	-33.61	150.74	Broadleaved	1.6	0.48	0.896	1.11	1442.4	1179.4	5895	1442.4	23.0784	5.66112	52.8192	16.0106	17	724	23	81.5587	7.06776	74.491	75	600	NA	NA	NA	NA	ECM/AM	50	17.3333	850	25	1.24036	57.2113	Woody	14740.4	0	0.450686	3.30207	1.29972	-0.15068	123.735	16.9244	245.984	122.103	245.984	122.103	0.450532
Scrapping	https://doi.org/10.1046/j.1461-0248.2003.00467.x , https://onlinelibrary.wiley.com/doi/full/10.1111/j.1365-2486.2009.02058.x	45.4038	-93.1856	Grassland	1.59	NA	0.8	0.73	2888.8	NA	8188.5	2888.8	45.9319	NA	65.508	21.0882	NA	660	NA	111.44	24.8437	86.5962	NA	NA	NA	NA	NA	NA	AM	100	6.26667	744	278	1.17866	56.2188	Non-woody	4668.6	0.0750025	0.926434	2.74068	1.05952	NA	95.0962	10.715	479.845	128.621	479.845	128.621	0.925775
Scrapping	https://doi.org/10.2307/2845913 , 10.1046/j.1365-2435.1997.00142.x , https://www.jstor.org/stable/pdf/2389406.pdf?refreqid=excelsior%3A9cb7fec6193493cae89367322812ac27&ab_segments=&origin= ,	37.4	-122.22	Grassland	1.6	NA	1.27	NA	630	NA	1020	630	10.08	NA	12.954	NA	NA	582	100	23.034	10.08	12.954	NA	NA	NA	NA	NA	NA	AM	100	13.9667	604	168	0.897646	63.5305	Non-woody	8435.87	0	0.809468	NA	NA	0.054754	122.427	24.0285	399.974	135.093	399.974	135.093	0.810507
Scrapping	https://link.springer.com/content/pdf/10.1007/s11104-005-5675-9.pdf	-40.23	175.27	Grassland	3.88	NA	1.515	1.525	1542	NA	3832.5	1542	59.8296	NA	58.0624	23.5155	12.9	870	NA	117.892	36.3141	81.5779	NA	NA	NA	NA	0.33	10.95	AM	100	13.1542	946	18	2.40341	59.5225	Non-woody	12447.8	NA	0.546001	3.04806	1.55325	-0.0667	142.576	24.9564	348.473	104.413	0.33	104.413	0.000516846
Scrapping	https://doi.org/10.1111/j.1469-8137.2012.04349.x	41.18	-104.9	Grassland	1.24	NA	0.73	0.82	1151.6	NA	707.5	1151.6	14.2798	NA	5.16475	9.44312	NA	384	1930	19.4446	4.83672	14.6079	NA	NA	NA	g/m	NA	NA	AM	100	7.37917	385	1901	0.996878	67.0327	Non-woody	2842.58	0.443753	0.354052	2.4252	1.10915	-0.157333	124.566	13.4836	172.777	136.606	172.777	136.606	0.256
Scrapping	https://doi.org/10.1007/s10533-006-9025-7 , /10.1029/97JD02317	55.88	-98.48	Coniferous	0.786	0.5725	0.25	0.5	640	1370	1350	540	5.0304	7.84325	3.375	2.7	-4.6	536	220.97	16.2487	2.3304	13.9183	155	5470	NA	NA	0.06	NA	ECM	0	-3.07083	511	261	4.02791	60	Woody	-1567.07	0	0.466927	2.94898	1.178	-0.32456	758.318	111.566	319.301	97.7005	0.06	97.7005	8.79e-05
Scrapping	https://doi.org/10.1007/s10533-006-9025-7 , /10.1029/97JD02318	55.93	-98.62	Coniferous	0.75	0.48	0.75	0.5	560	1340	1420	460	4.2	6.432	10.65	2.3	-4.6	536	220.97	21.282	1.9	19.382	63	1310	NA	NA	0.11	NA	ECM	0	-3.15833	511	291	2.10021	60.0962	Woody	-1609.65	0	0.209595	2.76302	1.14556	-0.0806451	758.318	111.566	140.881	99.1266	0.11	99.1266	0.000163559
Scrapping	https://doi.org/10.1007/s10533-006-9025-7 , /10.1029/97JD02319	55.85	-98.04	Broadleaved	1.375	0.845	0.32	1.3	1350	3890	1740	1350	18.5625	32.8705	5.568	17.55	-4.6	536	220.97	57.001	1.0125	55.9885	53	2250	NA	NA	0.18	NA	ECM/AM	50	-3.0875	524	235	3.43395	59.9669	Woody	-1611.3	0	0.228553	2.94423	1.15239	-0.329459	723.302	110.349	151.617	100.582	0.18	100.582	0.000271572
Scrapping	https://doi.org/10.1007/s10533-006-9025-7 , /10.1029/97JD02320	53.99	-105.12	Coniferous	0.6	0.27	0.28	0.48	920	1580	1510	770	5.52	4.266	4.228	3.696	-1.1	405	NA	14.014	1.824	12.19	115	6150	NA	NA	0.07	NA	ECM	0	0.0791666	471	593	2.04474	60.1422	Woody	39.2499	0	0.216915	2.54916	0.909539	0.0739737	557.638	46.1628	131.358	110.102	0.07	110.102	0.000115607
Scrapping	https://doi.org/10.1007/s10533-006-9025-7 , /10.1029/97JD02321	53.92	-104.69	Coniferous	0.9	0.21	0.23	0.61	830	1160	1260	790	7.47	2.436	2.898	4.819	-1.1	405	NA	12.804	2.651	10.153	65	1190	NA	NA	0.05	NA	ECM	0	-0.366667	471	516	2.39421	61.6158	Woody	-172.7	0	0.186408	2.5675	0.900068	0.0773811	672.646	65.1661	112.01	110.912	0.05	110.912	8.32e-05
Scrapping	https://doi.org/10.1007/s10533-006-9025-7 , /10.1029/97JD02322	53.63	-106.2	Broadleaved	1.5	0.235	0.27	1.33	1910	3440	1900	1910	28.65	8.084	5.13	25.403	-1.1	405	NA	41.864	3.247	38.617	67	980	NA	NA	0.21	NA	ECM/AM	50	0.6	470	589	2.17052	62.6414	Woody	278.083	0	0.262821	2.68232	1.03432	0.043718	785.477	68.2159	154.188	113.732	0.21	113.732	0.000358254
Scrapping	https://esajournals.onlinelibrary.wiley.com/doi/full/10.1890/02-5291	44.25	-110.22	Coniferous	0.92	0.173721	0.22	NA	1360	900	440	1360	12.512	1.56349	0.968	0	-0.5	465	2360	15.0435	NA	NA	NA	2250	NA	NA	NA	NA	ECM	0	-0.516667	613	2744	1.52439	55.0619	Woody	-306.5	0	0.774048	3.14419	1.24265	0.152708	365.513	15.7738	459.148	112.382	459.148	112.382	0.773997
Scrapping	R. Bras. Zootec., v.33, n.1, p.68-78, 2004	-22.016	-47.9	Grassland	NA	NA	NA	NA	NA	NA	NA	NA	NA	NA	NA	NA	NA	NA	836	199.88	NA	NA	NA	NA	NA	NA	NA	NA	AM	100	19.8	1443	847	NA	NA	Non-woody	28571.4	1	NA	0.922287	0.599376	NA	100.687	14.9113	NA	NA	NA	NA	NA
Scrapping	J.L. Stape et al. / Forest Ecology and Management 193 (2004) 17–31	-11.916	-38.54	Broadleaved	NA	NA	NA	NA	3400	6100	NA	NA	NA	NA	NA	NA	25.5	882	230	NA	NA	28.1481	5.1	NA	NA	NA	NA	NA	ECM/AM	50	22.6333	980	329	1.79396	58.2613	Woody	22188.8	1	0.400931	3.13444	0.928765	-0.259675	49.1528	4.9336	201.006	132.965	201.006	132.965	0.400899
Scrapping	J.L. Stape et al. / Forest Ecology and Management 193 (2004) 17–32	-11.95	-38.483	Broadleaved	NA	NA	NA	NA	5000	4700	NA	NA	NA	NA	NA	NA	25.5	916	270	NA	NA	39.5062	7.2	NA	NA	NA	NA	NA	ECM/AM	50	23.2792	1038	217	1.43239	58.8149	Woody	24159.4	1	0.437128	3.27928	0.93175	NA	49.1528	4.9336	219.236	132.902	219.236	132.902	0.437053
Scrapping	J.L. Stape et al. / Forest Ecology and Management 193 (2004) 17–33	-11.783	-38.55	Broadleaved	NA	NA	NA	NA	3900	5800	NA	NA	NA	NA	NA	NA	25.5	853	210	NA	NA	35.8025	6.1	NA	NA	NA	NA	NA	ECM/AM	50	23.2167	830	257	1.94414	59.0853	Woody	19262.9	1	0.389499	2.66343	0.904376	-0.249669	49.1528	4.9336	190.748	136.106	190.748	136.106	0.389429
Scrapping	J.L. Stape et al. / Forest Ecology and Management 193 (2004) 17–34	-11.85	-38.466	Broadleaved	NA	NA	NA	NA	4000	6600	NA	NA	NA	NA	NA	NA	25.5	935	250	NA	NA	38.2716	7.1	NA	NA	NA	NA	NA	ECM/AM	50	23.1833	944	230	1.73394	59.0109	Woody	21877.2	1	0.450616	2.90818	0.907515	-0.26871	49.1528	4.9336	228.053	131.82	228.053	131.82	0.450931
Scrapping	J.L. Stape et al. / Forest Ecology and Management 193 (2004) 17–35	-11.816	-38.366	Broadleaved	NA	NA	NA	NA	6100	8800	NA	NA	NA	NA	NA	NA	25.5	902	220	NA	NA	48.8889	7.3	NA	NA	NA	NA	NA	ECM/AM	50	23.4667	981	190	1.40961	60.0593	Woody	23020.8	1	0.416363	2.71076	0.884683	-0.212512	44.91	4.40792	210.947	131.636	210.947	131.636	0.416523
Scrapping	J.L. Stape et al. / Forest Ecology and Management 193 (2004) 17–36	-11.966	-38.55	Broadleaved	NA	NA	NA	NA	3900	10300	NA	NA	NA	NA	NA	NA	25.5	955	300	NA	NA	47.4074	6	NA	NA	NA	NA	NA	ECM/AM	50	22.8625	1020	290	1.6444	57.4881	Woody	23324	1	0.436603	3.31266	0.939127	NA	49.1528	4.9336	217.308	133.937	217.308	133.937	0.436585
Scrapping	J.L. Stape et al. / Forest Ecology and Management 193 (2004) 17–37	-11.783	-37.9	Broadleaved	NA	NA	NA	NA	3700	11100	NA	NA	NA	NA	NA	NA	25.5	1143	150	NA	NA	42.4691	5.1	NA	NA	NA	NA	NA	ECM/AM	50	23.7083	1446	159	2.11467	52.223	Woody	34282.2	1	0.325486	2.2228	0.841757	-0.25706	62.6849	9.73578	168.81	128.572	168.81	128.572	0.325564
Scrapping	J.L. Stape et al. / Forest Ecology and Management 193 (2004) 17–38	-12.03	-38.466	Broadleaved	NA	NA	NA	NA	4400	10600	NA	NA	NA	NA	NA	NA	25.5	958	310	NA	NA	46.4198	5	NA	NA	NA	NA	NA	ECM/AM	50	22.8708	1131	284	1.65775	52.0256	Woody	25881.1	1	0.384438	3.28197	0.927083	-0.29367	61.1815	12.4997	200.791	127.666	200.791	127.666	0.384513
Scrapping	J.L. Stape et al. / Forest Ecology and Management 193 (2004) 17–39	-12.08	-38.25	Broadleaved	NA	NA	NA	NA	3800	16000	NA	NA	NA	NA	NA	NA	25.5	1008	180	NA	NA	47.9012	6.3	NA	NA	NA	NA	NA	ECM/AM	50	23.8292	1389	116	1.6687	54.7047	Woody	33104.5	1	0.377687	2.57054	0.87272	-0.27136	40.9036	6.62291	193.312	130.245	193.312	130.245	0.377669
Scrapping	J.L. Stape et al. / Forest Ecology and Management 193 (2004) 17–40	-11.9666	-38.116	Broadleaved	NA	NA	NA	NA	4300	18000	NA	NA	NA	NA	NA	NA	25.5	1131	180	NA	NA	55.8025	6.1	NA	NA	NA	NA	NA	ECM/AM	50	23.4875	1440	177	1.54871	53.0077	Woody	33804	1	0.387685	2.18477	0.853035	-0.270231	44.91	4.40792	203.305	127.07	203.305	127.07	0.38751
Scrapping	J.L. Stape et al. / Forest Ecology and Management 193 (2004) 17–41	-12	-38.23	Broadleaved	NA	NA	NA	NA	5600	17400	NA	NA	NA	NA	NA	NA	25.5	1054	200	NA	NA	59.7531	6.2	NA	NA	NA	NA	NA	ECM/AM	50	23.5042	1342	169	1.73881	53.8091	Woody	31537	1	0.376617	2.65969	0.882412	-0.269523	40.9036	6.62291	199.027	126.006	199.027	126.006	0.376177
Scrapping	J.L. Stape et al. / Forest Ecology and Management 193 (2004) 17–42	-12.266	-38.85	Broadleaved	NA	NA	NA	NA	8200	16900	NA	NA	NA	NA	NA	NA	25.5	1605	50	NA	NA	69.6296	7.9	NA	NA	NA	NA	NA	ECM/AM	50	23.5625	1053	176	1.18903	59.7943	Woody	24824.5	1	0.521206	2.50467	0.872624	-0.286109	61.1815	12.4997	270.528	128.427	270.528	128.427	0.521146
Scrapping	J.L. Stape et al. / Forest Ecology and Management 193 (2004) 17–43	-12.3	-38.016	Broadleaved	NA	NA	NA	NA	6100	22100	NA	NA	NA	NA	NA	NA	25.5	1611	80	NA	NA	79.0123	6.3	NA	NA	NA	NA	NA	ECM/AM	50	24.4625	1814	41	1.4889	50.1062	Woody	44397.7	1	0.376888	2.14773	0.834177	NA	40.9036	6.62291	199.54	125.739	199.54	125.739	0.37635
Scrapping	J.L. Stape et al. / Forest Ecology and Management 193 (2004) 17–44	-12.5	-38.95	Broadleaved	NA	NA	NA	NA	9000	30100	NA	NA	NA	NA	NA	NA	25.5	1654	100	NA	NA	98.2716	6.3	NA	NA	NA	NA	NA	ECM/AM	50	23.1667	1119	215	1.57124	58.1037	Woody	25904.8	1	0.414632	2.78165	0.902333	NA	54.3144	12.371	206.515	133.844	206.515	133.844	0.414612
Scrapping	10.1002/2017JG004103	-2.983	-47.516	Broadleaved	NA	NA	NA	NA	NA	NA	NA	NA	NA	NA	NA	NA	NA	1800	NA	153	NA	NA	NA	NA	NA	NA	NA	NA	AM	100	25.9792	1988	131	1.30434	49.7049	Woody	51621.7	1	0.290595	1.92199	0.81132	-0.52171	108.795	16.9298	169.534	114.264	169.534	114.264	0.290575
Scrapping	https://helda.helsinki.fi/bitstream/handle/1975/9310/208.pdf?sequence=3&isAllowed=y	62.85	30.883	Coniferous	1.54	0.065	0.64	0.62	1286	2016	2501	930	19.8044	1.3104	16.0064	5.766	NA	NA	155	37.1212	14.0384	23.0828	45	NA	NA	NA	NA	NA	ECM	0	2.025	657	165	2.48187	45.9963	Woody	1335.9	0	1.00669	3.9512	2.86936	0.218676	418.835	108.427	823.09	81.5622	823.09	81.5622	1.00699
Scrapping	https://helda.helsinki.fi/bitstream/handle/1975/9310/208.pdf?sequence=3&isAllowed=y	62.85	30.883	Coniferous	1.39	0.059	1.1	0.84	695	1668	1077	651	9.6605	0.98412	11.847	5.4684	NA	NA	NA	22.4916	4.1921	18.2995	NA	NA	NA	NA	NA	NA	ECM	0	2.025	657	165	2.48187	45.9963	Woody	1335.9	0	1.00669	3.9512	2.86936	0.218676	418.835	108.427	823.09	81.5622	823.09	81.5622	1.00699
Scrapping	https://helda.helsinki.fi/bitstream/handle/1975/9310/208.pdf?sequence=3&isAllowed=y	62.85	30.883	Broadleaved	2.29	0.104	0.94	1.35	1251	1494	868	709	28.6479	1.55376	8.1592	9.5715	NA	NA	NA	38.3609	19.0764	19.2845	NA	NA	NA	NA	NA	NA	ECM	0	2.025	657	165	2.48187	45.9963	Woody	1335.9	0	1.00669	3.9512	2.86936	0.218676	418.835	108.427	823.09	81.5622	823.09	81.5622	1.00699
Scrapping	https://helda.helsinki.fi/bitstream/handle/1975/9310/208.pdf?sequence=3&isAllowed=y	62.85	30.883	Coniferous	1.38	0.058	0.665	0.89	1112	2328	3266	383	15.3456	1.35024	21.7189	3.4087	NA	NA	NA	38.4147	11.9369	26.4778	NA	NA	NA	NA	NA	NA	ECM	0	2.025	657	165	2.48187	45.9963	Woody	1335.9	0	1.00669	3.9512	2.86936	0.218676	418.835	108.427	823.09	81.5622	823.09	81.5622	1.00699
Scrapping	https://sci-hub.hkvisa.net/https://doi.org/10.1139/x26-148	64.7202	-148.206	Broadleaved	1.35	0.155603	1.447	1.22089	2662	7005	3551	2662	35.937	10.9	51.383	32.5	-3.5	269	NA	98.22	3.437	94.783	30	NA	NA	NA	NA	NA	ECM/AM	50	-2.84583	297	120	1.76129	60.1965	Woody	-841.5	0	0.647272	3.86098	2.06183	0.251805	121.161	20.2016	671.56	64.2309	671.56	64.2309	0.647023
Scrapping	https://sci-hub.hkvisa.net/https://doi.org/10.1139/x26-149	64.7202	-148.206	Broadleaved	1.76	0.186132	1.05	0.944233	1578	4889	4386	1578	27.7728	9.1	46.053	14.9	-3.5	269	NA	82.9258	12.8728	70.053	90	NA	NA	NA	NA	NA	ECM/AM	50	-2.84583	297	120	1.76129	60.1965	Woody	-841.5	0	0.647272	3.86098	2.06183	0.251805	121.161	20.2016	671.56	64.2309	671.56	64.2309	0.647023
Scrapping	https://sci-hub.hkvisa.net/https://doi.org/10.1139/x26-150	64.7202	-148.206	Coniferous	1.04	0.162482	1.255	0.834202	959	2708	2477	959	9.9736	4.4	31.0863	8	-3.5	269	NA	45.4599	1.9736	43.4864	250	NA	NA	NA	NA	NA	ECM	0	-2.84583	297	120	1.76129	60.1965	Woody	-841.5	0	0.647272	3.86098	2.06183	0.251805	121.161	20.2016	671.56	64.2309	671.56	64.2309	0.647023
Scrapping	https://sci-hub.hkvisa.net/https://doi.org/10.1139/x26-151	64.7202	-148.206	Coniferous	0.88	0.205357	0.646	0.453752	573	112	2324	573	5.0424	0.23	15.013	2.6	-3.5	269	NA	20.2854	2.4424	17.843	200	NA	NA	NA	NA	NA	ECM	0	-2.84583	297	120	1.76129	60.1965	Woody	-841.5	0	0.647272	3.86098	2.06183	0.251805	121.161	20.2016	671.56	64.2309	671.56	64.2309	0.647023
Scrapping	https://sci-hub.hkvisa.net/https://doi.org/10.1139/x26-152	64.7546	-148.294	Broadleaved	2.1	0.16055	2.867	0.716433	1996	6104	2755	1996	41.916	9.8	78.9858	14.3	-3.5	269	NA	130.702	27.616	103.086	77.5	NA	NA	NA	NA	NA	ECM/AM	50	-2.74167	295	238	1.90426	51.6385	Woody	-808.792	0	0.418858	3.7351	1.80262	0.280507	121.33	20.2016	659.97	42.7603	659.97	42.7603	0.423308
Scrapping	https://sci-hub.hkvisa.net/https://doi.org/10.1139/x26-153	64.7546	-148.294	Coniferous	1.07	0.173721	1.645	0.702268	1367	3166	1574	1367	14.6269	5.5	25.8923	9.6	-3.5	269	NA	46.0192	5.0269	40.9923	130	NA	NA	NA	NA	NA	ECM	0	-2.74167	295	238	1.90426	51.6385	Woody	-808.792	0	0.418858	3.7351	1.80262	0.280507	121.33	20.2016	659.97	42.7603	659.97	42.7603	0.423308
Scrapping	https://nph.onlinelibrary.wiley.com/doi/10.1111/nph.17154 , https://bg.copernicus.org/articles/6/2759/2009/bg-6-2759-2009.pdf , https://doi.org/10.1111/j.1529-8817.2003.00757.x	-2.5	-60	Broadleaved	1.767	0.36	0.74	1.265	8600	3800	4000	8600	151.962	13.68	29.6	108.79	27.1	2273	NA	195.242	43.172	152.07	NA	NA	NA	NA	0.16	NA	AM	100	26.3375	2386	114	1.36437	40.5439	Woody	62831.3	1	0.310896	1.98607	0.825597	-0.398078	128.541	19.5164	176.91	117.148	0.16	117.148	0.000281155
Scrapping	https://sci-hub.hkvisa.net/10.1016/s0168-1923(02)00099-0 , https://esajournals.onlinelibrary.wiley.com/doi/full/10.1890 , https://doi.org/10.2307/2640982/1051-0761%282000%29010%5B0018%3AIEOACA%5D2.0.CO%3B2 https://doi.org/10.1890/10-0633.1	45.58	-84.7	Broadleaved	2.275	0.36	1.65	0.778	2660	3700	6020	2660	60.515	13.32	99.33	20.6948	6.2	750	NA	173.165	39.8202	133.345	90	NA	NA	NA	0.0628	NA	AM	100	6.1625	795	214	NA	NA	Woody	4902.5	0	NA	2.98682	1.2538	NA	NA	NA	NA	NA	0.0628	NA	NA
Scrapping	https://d1wqtxts1xzle7.cloudfront.net/42258910/Patterns_of_nutrient_accumulation_and_re20160206-3119-89mfr1-libre.pdf?1454824063=&response-content-disposition=inline%3B+filename%3DPatterns_of_nutrient_accumulation_and_re.pdf&Expires=1657823420& , Signature=WCYoNDM5HI8QBclC07691G-5IkaHvnD0syIP42P8XcjktYcA8uwbqhRGNzEASiZ0RZqZUqhOtUMF4dNflh24~IHmMfPn7ES8roNekue1uoIVzy07y2-JaH-S--wzUzNFrS0S08-KXI2Vwr…	1.9	-67.9	Broadleaved	1.336	0.36	2.38	1.31	6500	9400	3109.8	6500	86.84	33.84	74.0132	85.15	26	3565	122	194.693	1.69	193.003	NA	NA	NA	NA	NA	NA	AM	100	26.0042	3621	159	1.91778	46.9108	Woody	94176.2	1	0.607344	3.61317	1.00784	-0.255323	102.073	16.7776	353.392	114.465	353.392	114.465	0.606764
Scrapping	https://d1wqtxts1xzle7.cloudfront.net/42258910/Patterns_of_nutrient_accumulation_and_re20160206-3119-89mfr1-libre.pdf?1454824063=&response-content-disposition=inline%3B+filename%3DPatterns_of_nutrient_accumulation_and_re.pdf&Expires=1657823420& , Signature=WCYoNDM5HI8QBclC07691G-5IkaHvnD0syIP42P8XcjktYcA8uwbqhRGNzEASiZ0RZqZUqhOtUMF4dNflh24~IHmMfPn7ES8roNekue1uoIVzy07y2-JaH-S--wzUzNFrS0S08-KXI2Vwr…	1.9	-67.3	Broadleaved	0.92	0.36	1.04	0.7	5200	6300	244.8	5200	47.84	22.68	2.54592	36.4	NA	NA	117	73.0659	11.44	61.6259	NA	NA	NA	NA	NA	NA	AM	100	26.2292	3508	116	2.2244	43.993	Woody	92026.5	1	0.679412	2.90785	1.05656	-0.192274	116.521	19.276	388.725	116.514	388.725	116.514	0.679378
Scrapping	https://www.researchgate.net/profile/Carlos-Busso-4/publication/279693908_Production_and_nitrogen_cycling_in_an_ecosystem_of_Eragrostis_curvula_in_semiarid_Argentina_I_Plant_biomass_and_productivity/links/5bd3a1aca6fdcc3a8da92228/Production-and-nitrogen-cycling-in-an-ecosystem-of-Eragrostis-curvula-in-semiarid-Argentina-I-Plant-biomass-and-productivity.pdf?_sg%5B0%5D=M9IgYG8TDphRP65qxLr4oHPGkqbX0…	-38.783	-62.633	Grassland	NA	NA	NA	NA	6908	NA	13226	6908	NA	NA	NA	NA	NA	601	10	215.8	NA	NA	NA	NA	NA	NA	NA	NA	NM/AM	50	15.3292	575	14	0.970413	75.8853	Non-woody	8807.08	0.401875	0.318527	2.4462	0.912982	-0.0830542	101.35	16.2591	176.987	119.991	176.987	119.991	0.318553
Scrapping	https://doi.org/10.1080/11263504.2012.661798	38.533	-8.016	Broadleaved	NA	NA	NA	NA	NA	NA	NA	NA	48.1	30.6	35.7	22.5	15.4	665	240	114.4	25.6	88.8	NA	NA	NA	NA	NA	NA	ECM	0	16.0333	625	228	1.59174	59.255	Woody	10020.8	0	0.46005	2.83464	1.52535	NA	100.045	15.1767	222.756	137.873	222.756	137.873	0.460681
Scrapping	https://doi.org/10.1080/11263504.2012.661798	38.533	-8.016	Broadleaved	NA	NA	NA	NA	NA	NA	NA	NA	100	41.6	45.7	17.7	15.4	665	240	187.3	82.3	105	NA	NA	NA	NA	NA	NA	ECM	0	16.0333	625	228	1.59174	59.255	Woody	10020.8	0	0.46005	2.83464	1.52535	NA	100.045	15.1767	222.756	137.873	222.756	137.873	0.460681
Scrapping	10.1007/s10021-009-9255-3	68.35	18.816	Broadleaved	1.1	0.82	0.62	0.86	1170	640	320	1170	12.87	5.248	1.984	10.062	-12	304	NA	20.102	2.808	17.294	NA	NA	NA	NA	NA	NA	ERM	0	-0.8875	340	421	2.20806	57.5612	Woody	-300.333	0	0.819973	3.64432	1.84801	0.314647	195.362	15.952	764.583	71.5908	764.583	71.5908	0.821056
Scrapping	10.1007/s10021-009-9255-3	68.35	18.816	Broadleaved	0.91	0.783	0.72	0.81	800	390	260	800	7.28	3.0537	1.872	6.48	-12	304	NA	12.2057	0.8	11.4057	NA	NA	NA	NA	NA	NA	ERM	0	-0.8875	340	421	2.20806	57.5612	Woody	-300.333	0	0.819973	3.64432	1.84801	0.314647	195.362	15.952	764.583	71.5908	764.583	71.5908	0.821056
Scrapping	https://doi.org/10.1002/jgrg.20109 , 10.1017/S0266467416000018, https://doi.org/10.1111/nph.16672 , https://www.proquest.com/docview/304480440?pq-origsite=gscholar&fromopenview=true	4.2	114.03	Broadleaved	1.67	0.203	0.226	0.64	9860	7040	4970	9860	164.662	14.2912	11.2322	63.104	25.9	2630	NA	190.185	101.558	88.6274	NA	NA	NA	NA	NA	NA	ECM/AM	50	26.6042	3083	119	2.04416	46.422	Woody	82033.5	0.780638	0.608979	3.66182	1.05251	-0.380253	143.932	44.3431	367.735	110.404	367.735	110.404	0.608989
Scrapping	https://doi.org/10.1016/j.foreco.2009.07.019 , 10.5194/bg-8-2179-201 , 10.1016/j.agee.2008.10.023	-1.485	120.051	Broadleaved	1.809	0.36	1.248	NA	6350	5620	2090	6350	114.871	20.232	26.0832	NA	20.8	3534	1050	161.187	NA	NA	NA	869	NA	NA	NA	13	ECM/AM	50	21.45	1971	1129	1.67381	50	Woody	42294.4	0.649364	0.585352	3.53501	1.70903	-0.387598	156.066	22.5456	383.146	101.879	383.146	101.879	0.585516
Scrapping	Ecosystems (1999) 2: 242–254 , https://doi.org/10.1890/0012-9658(2001)082[0485:EONAPA]2.0.CO
Scrapping	Ecosystems (1999) 2: 242–254 , https://doi.org/10.1890/0012-9658(2001)082[0485:EONAPA]2.0.CO
Scrapping	Ecosystems (1999) 2: 242–254 , https://doi.org/10.1890/0012-9658(2001)082[0485:EONAPA]2.0.CO
Scrapping	Ecology, 66(4), 1985, pp. 1377-1390	43.0427	-89.4222	Broadleaved	NA	NA	NA	NA	NA	NA	NA	NA	44	20	79	31	NA	NA	NA	143	13	130	NA	1011	NA	NA	NA	NA	ECM	0	7.93333	828	273	0.544308	59.8828	Woody	6568.8	0	1.56246	2.36101	0.999993	NA	75.6562	7.6409	769.511	135.494	769.511	135.494	1.56396
Scrapping	Ecology, 66(4), 1985, pp. 1377-1391	43.0427	-89.4222	Broadleaved	NA	NA	NA	NA	NA	NA	NA	NA	43	28	62	30	NA	NA	NA	133	13	120	NA	1204	NA	NA	NA	NA	ECM	0	7.93333	828	273	0.544308	59.8828	Woody	6568.8	0	1.56246	2.36101	0.999993	NA	75.6562	7.6409	769.511	135.494	769.511	135.494	1.56396
Scrapping	Ecology, 66(4), 1985, pp. 1377-1392	43.0427	-89.4222	Broadleaved	NA	NA	NA	NA	NA	NA	NA	NA	39	21	47	26	NA	NA	NA	107	13	94	NA	986	NA	NA	NA	NA	ECM	0	7.93333	828	273	0.544308	59.8828	Woody	6568.8	0	1.56246	2.36101	0.999993	NA	75.6562	7.6409	769.511	135.494	769.511	135.494	1.56396
Scrapping	Ecology, 66(4), 1985, pp. 1377-1393	43.0427	-89.4222	Broadleaved	NA	NA	NA	NA	NA	NA	NA	NA	36	19	47	23	NA	NA	NA	102	13	89	NA	1063	NA	NA	NA	NA	AM	100	7.93333	828	273	0.544308	59.8828	Woody	6568.8	0	1.56246	2.36101	0.999993	NA	75.6562	7.6409	769.511	135.494	769.511	135.494	1.56396
Scrapping	Ecology, 66(4), 1985, pp. 1377-1394	43.0427	-89.4222	Broadleaved	NA	NA	NA	NA	NA	NA	NA	NA	38	11	43	25	NA	NA	NA	92	13	79	NA	2211	NA	NA	NA	NA	ECM	0	7.93333	828	273	0.544308	59.8828	Woody	6568.8	0	1.56246	2.36101	0.999993	NA	75.6562	7.6409	769.511	135.494	769.511	135.494	1.56396
Scrapping	Ecology, 66(4), 1985, pp. 1377-1395	43.0427	-89.4222	Coniferous	NA	NA	NA	NA	NA	NA	NA	NA	29	9	41	21	NA	NA	NA	79	8	71	NA	1194	NA	NA	NA	NA	ECM	0	7.93333	828	273	0.544308	59.8828	Woody	6568.8	0	1.56246	2.36101	0.999993	NA	75.6562	7.6409	769.511	135.494	769.511	135.494	1.56396
Scrapping	Ecology, 66(4), 1985, pp. 1377-1396	43.0427	-89.4222	Coniferous	NA	NA	NA	NA	NA	NA	NA	NA	24	9	36	16	NA	NA	NA	69	8	61	NA	809	NA	NA	NA	NA	ECM	0	7.93333	828	273	0.544308	59.8828	Woody	6568.8	0	1.56246	2.36101	0.999993	NA	75.6562	7.6409	769.511	135.494	769.511	135.494	1.56396
Scrapping	Ecology, 66(4), 1985, pp. 1377-1397	43.0427	-89.4222	Coniferous	NA	NA	NA	NA	NA	NA	NA	NA	36	8	22	28	NA	NA	NA	66	8	58	NA	2124	NA	NA	NA	NA	ECM	0	7.93333	828	273	0.544308	59.8828	Woody	6568.8	0	1.56246	2.36101	0.999993	NA	75.6562	7.6409	769.511	135.494	769.511	135.494	1.56396
Scrapping	Ecology, 66(4), 1985, pp. 1377-1398	43.0427	-89.4222	Coniferous	NA	NA	NA	NA	NA	NA	NA	NA	20	7	20	12	NA	NA	NA	47	8	39	NA	1504	NA	NA	NA	NA	ECM	0	7.93333	828	273	0.544308	59.8828	Woody	6568.8	0	1.56246	2.36101	0.999993	NA	75.6562	7.6409	769.511	135.494	769.511	135.494	1.56396
Scrapping	https://doi.org/10.1038/nature02850 , https://doi.org/10.1007/s11104-008-9579-3 , https://doi.org/10.1016/j.scitotenv.2022.156374 , https://doi.org/10.1016/j.agee.2009.03.002 ,	43.6333	116.7	Grassland	2.25	NA	1.69	1.756	1800	NA	1930	1800	40.5	NA	32.617	3.1608	0.7	343	1200	73.117	37.3392	35.7778	NA	NA	NA	NA	0.21	10	AM	100	1.7	318	1183	0.640077	80	Non-woody	535.3	0.199378	0.577908	2.57221	1.00666	-0.00819091	154.349	14.7038	285.282	135.054	0.21	135.054	0.000425421
Scrapping	10.1007/s100210000063	32.466	-84.016	Broadleaved	NA	0.36	0.98	5.63	5884	9198	1326	5884	67.61	33.1128	12.9948	33.13	NA	NA	NA	113.718	34.48	79.2376	NA	NA	6.8	4.67	0.283	14.09	ECM/AM	50	17.9708	1173	97	1.65318	52.8366	Woody	21084.7	0	0.428504	3.02313	1.3553	-0.29802	31.6754	6.84662	195.699	145.977	0.283	145.977	0.000619673
Scrapping	Below-ground and above-ground production of vegetational organic matter along a climosequence in alpine grasslands	46.7772	9.97533	Grassland	1.72	NA	1.24	NA	484.1	NA	2161.29	484.1	8.32652	NA	26.8	1.4	-2.2	1800	2525	35.1265	6.92652	28.2	NA	NA	NA	3.46	NA	NA	NM/AM	50	-2.25417	1268	2528	1.06599	57.3607	Non-woody	-2863.57	1	1.14764	3.23133	1.33498	0.171196	322.934	54.8129	729.367	104.892	729.367	104.892	1.14757
Scrapping	Below-ground and above-ground production of vegetational organic matter along a climosequence in alpine grasslands	46.7915	9.97692	Grassland	1.73	NA	1.24	NA	885.6	NA	2427.42	885.6	15.3209	NA	30.1	9.958	-0.7	1800	2240	45.4209	5.36288	40.058	NA	NA	NA	3.95	NA	NA	NM/AM	50	-1.39583	1224	2383	1.04612	58.0908	Non-woody	-1723.8	1	1.22287	3.23533	1.3365	0.186211	322.934	54.8129	790.651	103.166	790.651	103.166	1.22353
Scrapping	Below-ground and above-ground production of vegetational organic matter along a climosequence in alpine grasslands	46.8183	9.97766	Grassland	1.74	NA	1.24	NA	935.6	NA	3862.9	935.6	16.2794	NA	47.9	10.25	1.1	1800	1895	64.1794	6.02944	58.15	NA	NA	NA	3.53	NA	NA	NM/AM	50	0.991667	1066	1978	0.94194	51.445	Non-woody	1057.12	1	1.11209	3.25135	1.34257	0.166492	322.934	54.8129	747.491	99.3547	747.491	99.3547	1.114
Scrapping	Below-ground and above-ground production of vegetational organic matter along a climosequence in alpine grasslands	46.8268	9.97203	Grassland	1.74	NA	1.24	NA	1194.7	NA	4024.19	1194.7	20.7878	NA	49.9	9.77	1.4	1800	1835	70.6878	11.0178	59.67	NA	NA	NA	3.55	NA	NA	NM/AM	50	1.72917	1020	1842	0.912669	52.4758	Non-woody	1759.5	1	1.11269	3.2583	1.34654	0.172604	322.934	54.8129	735.998	100.961	735.998	100.961	1.1146
Scrapping	Below-ground and above-ground production of vegetational organic matter along a climosequence in alpine grasslands	46.8361	9.96617	Grassland	1.73	NA	1.24	NA	1462.6	NA	3096.77	1462.6	25.303	NA	38.4	16.19	2.3	1800	1665	63.703	9.11298	54.59	NA	NA	NA	3.53	NA	NA	NM/AM	50	2.97917	979	1599	1.04728	55.1111	Non-woody	2912.52	1	1.00717	3.26529	1.35005	0.156289	322.934	54.8129	669.787	100.367	669.787	100.367	1.00837
Scrapping	https://doi.org/10.1007/s00442-021-04860-8	-3.1293	37.3637	Broadleaved	1.319	0.36	0.69	1.28	9	860	4350	9	0.11871	3.096	30.015	0.1152	6	1051	3700	33.2297	0.00351	33.2262	NA	2091	NA	4.45	NA	19.6	ERM	0	5.8875	1543	3834	1.45463	55.6171	Woody	9065.12	0.275005	0.666961	3.17647	1.33711	0.179784	342.895	53.2359	430.761	103.229	430.761	103.229	0.667002
Scrapping	https://doi.org/10.1007/s00442-021-04860-8	-3.1491	37.3425	Broadleaved	1.7	0.36	1.54	1.184	3180	3020	4420	3180	54.06	10.872	68.068	37.6512	9.3	1545	2900	133	16.4088	116.591	NA	523	NA	3.83	NA	18.6	AM	100	9.69167	1390	3032	1.25107	55.3074	Woody	13471.4	0.375005	0.63377	3.16927	1.33921	0.153284	342.895	53.2359	381.836	110.677	381.836	110.677	0.633906
Scrapping	https://doi.org/10.1007/s00442-021-04860-8	-3.1699	37.3388	Broadleaved	2.358	0.36	1.7	1.237	3240	3820	4830	3240	76.3992	13.752	82.11	40.0788	11.3	1995	2500	172.261	36.3204	135.941	NA	311	NA	3.49	NA	19.3	AM	100	13.5083	1276	2320	1.21027	55.6734	Woody	17226	0.525005	0.670317	3.18025	1.35093	0.0415781	342.895	53.2359	402.817	110.965	402.817	110.965	0.670481
Scrapping	https://doi.org/10.1007/s00442-021-04860-8	-3.19038	37.3278	Broadleaved	2.6	0.36	1.65	1.387	6140	3990	5730	6140	159.64	14.364	94.545	85.1618	14.7	2227	1900	268.549	74.4782	194.071	NA	397	NA	4.23	NA	15.9	AM	100	15.5667	1330	2011	1.67694	57	Woody	20736.9	0.625005	0.590102	3.17604	1.3548	-0.0239191	342.895	53.2359	367.638	106.976	367.638	106.976	0.589928
Scrapping	10.1111/j.1365-2486.2010.02367.x	-4.115	-78.9672	Broadleaved	3.361	0.36	2.155	1.74	5050	2820	2450	5050	169.731	10.152	52.7975	87.87	19.4	2230	1050	232.68	81.8605	150.82	NA	968	NA	3.94	NA	22	AM	100	21.7792	1267	1300	1.62367	54.5813	Woody	27610	1	0.852437	3.46873	1.53724	-0.265536	207.497	27.5854	527.768	107.682	527.768	107.682	0.852467
Scrapping	10.1111/j.1365-2486.2010.02367.x	-4.11167	-78.9672	Broadleaved	3.632	0.36	1.72	1.04	5060	1580	3950	5060	183.779	5.688	67.94	52.624	17.5	2300	1540	257.407	131.155	126.252	NA	2222	NA	3.9	NA	29	AM	100	21.7792	1267	1300	1.62367	54.5813	Woody	27610	1	0.852437	3.46873	1.53724	-0.265536	207.497	27.5854	527.768	107.682	527.768	107.682	0.852467
Scrapping	10.1111/j.1365-2486.2010.02367.x	-3.97639	-79.0819	Broadleaved	3.5	0.36	1.15	1.04	4960	870	3200	4960	173.6	3.132	36.8	51.584	15.7	1950	1890	213.532	122.016	91.516	NA	2333	NA	3.52	NA	28	AM	100	16.8667	827	2035	1.62346	54.8614	Woody	13948.7	1	0.997463	3.47874	1.59506	-0.177928	199.373	27.4719	612.783	108.798	612.783	108.798	1.00004
Scrapping	10.1111/j.1365-2486.2010.02367.x	-3.98861	-79.0819	Broadleaved	3.5	0.36	0.91	0.83	2640	220	3950	2640	92.4	0.792	35.945	21.912	13.2	5000	2380	129.137	70.488	58.649	NA	2753	NA	3.26	NA	46	AM	100	15.8042	985	2214	1.54508	56.1437	Woody	15579.4	1	0.98047	3.48207	1.59526	-0.166673	199.373	27.4719	588.132	111.262	588.132	111.262	0.981555
Scrapping	10.1111/j.1365-2486.2010.02367.x	-4.11639	-79.1828	Broadleaved	3.5	0.36	0.55	0.807	1790	140	10290	1790	62.65	0.504	56.595	14.4453	9.4	4500	3060	119.749	48.2047	71.5443	NA	8317	NA	2.86	NA	63	AM	100	13.1292	1119	2821	1.55928	54	Woody	14677.5	1	0.691014	3.15573	1.4482	-0.0151108	207.497	27.5854	432.999	106.388	432.999	106.388	0.690989
Scrapping	https://doi.org/10.1016/S0378-1127(00)00319-4	59.75	17.6667	Broadleaved	3.96	0.57	1.261	2.442	1828.3	5721.5	4806.6	1828.3	72.4007	32.6125	60.6112	44.6471	5.8	544	NA	165.624	27.7536	137.871	NA	NA	NA	NA	NA	NA	ECM/AM	50	5.65417	558	46	1.11915	48.3258	Woody	3157.35	0	1.1581	3.17009	1.42027	-0.0630093	151.55	19.3562	753.501	102.613	753.501	102.613	1.15979
Scrapping	Production and nitrogen cycling in an ecosystem of Eragrostis curvula in semiarid Argentina. I. Plant biomass and productivity Production and nitrogen cycling in an ecosytem of Eragrostis curvula in semiarid Argentina. II. Nitrogen content and transfers	-38.783	-62.633	Grassland	0.67	NA	1.838	0.4236	6620.91	NA	5713.51	6620.91	44.3601	NA	105.014	28.0462	15.4	601	10	149.374	16.3139	133.06	10	NA	NA	NA	NA	NA	NM/AM	50	15.3292	575	14	0.970413	75.8853	Non-woody	8807.08	0.401875	0.318527	2.4462	0.912982	-0.0830542	101.35	16.2591	176.987	119.991	176.987	119.991	0.318553
Scrapping	https://doi.org/10.1139/x92-041	40.27	-105.64	Coniferous	1.045	0.125	0.5	0.515	1700	871	1510	1700	17.765	1.08875	7.55	8.755	1.5	1000	3500	26.4037	9.01	17.3938	350	NA	NA	NA	NA	NA	ECM	0	-0.00833327	638	3239	1.69255	55.6797	Woody	-5.07e-05	0.631254	0.710517	3.38108	1.4811	0.0400634	378.918	21.4377	430.285	110.051	430.285	110.051	0.7103
Scrapping	https://doi.org/10.1016/S0378-1127(01)00648-X	62.783	30.966	Coniferous	NA	0.173721	NA	NA	579	1427	1761	579	6.49	3.43	9.19	NA	1.9	649	145	19.11	NA	NA	15	7425	NA	NA	NA	NA	ECM	0	2.19583	658	140	2.0862	48.1919	Woody	1447.6	0	1.15422	3.9512	2.85683	0.15102	497.167	71.9698	859.505	89.5201	859.505	89.5201	1.15414
Scrapping	https://doi.org/10.1016/S0378-1127(01)00648-X	62.783	30.966	Coniferous	NA	0.173721	NA	NA	1600	3237	8201	1600	17.76	5.13	43.03	NA	1.9	649	145	65.92	NA	NA	35	2660	NA	NA	NA	NA	ECM	0	2.19583	658	140	2.0862	48.1919	Woody	1447.6	0	1.15422	3.9512	2.85683	0.15102	497.167	71.9698	859.505	89.5201	859.505	89.5201	1.15414
Scrapping	https://doi.org/10.1016/S0378-1127(01)00648-X	62.783	30.966	Coniferous	NA	0.173721	NA	NA	1924	2203	9808	1924	20.08	1.45	49.13	NA	1.9	649	145	70.66	NA	NA	100	432	NA	NA	NA	NA	ECM	0	2.19583	658	140	2.0862	48.1919	Woody	1447.6	0	1.15422	3.9512	2.85683	0.15102	497.167	71.9698	859.505	89.5201	859.505	89.5201	1.15414
Scrapping	https://doi.org/10.1016/j.foreco.2017.04.004	58.09	26.87	Broadleaved	3.37	0.53	0.9	3.143	2030	4394	1034	2030	68.411	23.2882	9.306	63.8029	NA	NA	NA	101.005	4.6081	96.3971	7	18750	NA	NA	NA	14.1	ECM	0	5.34167	626	97	0.934157	51.3722	Woody	3349.1	0	1.06495	2.99068	1.38543	0.134138	121.798	14.494	826.706	85.9438	826.706	85.9438	1.06575
Scrapping	https://doi.org/10.1016/j.foreco.2017.04.004	58.41	26.54	Broadleaved	3.37	0.53	0.9	3.143	3247	4952	964	3247	109.424	26.2456	8.676	102.053	NA	NA	NA	144.345	7.37069	136.975	17	4630	NA	NA	NA	13	ECM	0	5.45417	619	42	1.22346	57.9905	Woody	3378.71	0.268113	1.08996	3.28173	1.6427	0.121437	166.682	28.981	846.208	85.9332	846.208	85.9332	1.09076
Scrapping	https://doi.org/10.1016/j.foreco.2017.04.004	58.35	27.18	Broadleaved	3.37	0.53	0.9	3.143	4220	3944	770	4220	142.214	20.9032	6.93	132.635	NA	NA	NA	170.047	9.5794	160.468	21	3280	NA	NA	NA	14	ECM	0	5.35	604	32	1.3822	59.5791	Woody	3236.43	0	1.07494	3.20498	1.55658	0.0687572	NA	NA	781.434	91.7019	781.434	91.7019	1.07488
Scrapping	https://doi.org/10.1016/j.foreco.2017.04.004	58.33	27.31	Broadleaved	3.37	0.53	0.9	3.143	4330	6258	1220	4330	145.921	33.1674	10.98	136.092	NA	NA	NA	190.068	9.8291	180.239	32	1528	NA	NA	NA	11.9	ECM	0	5.38333	607	44	1.28794	54.8675	Woody	3257.57	0	1.12254	3.16512	1.46349	0.0796512	102.792	28.3074	873.058	85.7247	873.058	85.7247	1.12264
Scrapping	https://doi.org/10.1016/j.foreco.2017.04.004	58.09	26.97	Broadleaved	3.37	0.53	0.9	3.143	3790	5996	1168	3790	127.723	31.7788	10.512	119.12	NA	NA	NA	170.014	8.6033	161.411	38	2734	NA	NA	NA	13.3	ECM	0	5.42083	624	80	0.923414	53.6643	Woody	3390.4	0	1.03847	3.02798	1.41068	0.13154	102.792	28.3074	798.111	86.7514	798.111	86.7514	1.03856
Scrapping	https://doi.org/10.1002/ecy.2691 , https://link.springer.com/article/10.1007/s11104-006-9168-2#Tab4	10.71	-85.59	Broadleaved	2.61	0.33	1.67	1.65	6200	8500	1720	6200	161.82	28.05	28.724	102.3	25.8	1575	NA	218.594	59.52	159.074	NA	NA	NA	NA	NA	12.4	AM	100	26.8	1658	153	1.00696	62.2752	Woody	44434.4	1	0.475221	3.60436	0.883336	NA	367.144	52.0251	264.158	120.991	264.158	120.991	0.479411
Scrapping	https://doi.org/10.1007/s11104-011-0946-0	33.38	-81.66	Broadleaved	2.7175	0.815	1.04	1.335	2052	1748	3600	2052	55.7631	14.2462	37.44	27.3942	17.9	NA	NA	107.449	28.3689	79.0804	4	NA	1.5	4.9	NA	NA	ECM/AM	50	17.2917	1190	114	1.85631	49.2765	Woody	20577.1	0.368119	0.38523	3.35297	1.49471	-0.165262	48.1637	10.0305	175.748	146.122	175.748	146.122	0.385211
Scrapping	https://doi.org/10.1007/s11104-011-0946-0	33.38	-81.66	Broadleaved	2.36	0.39	0.79	1.01	3145	4255	5700	3145	74.222	16.5945	45.03	31.7645	17.9	NA	NA	135.846	42.4575	93.389	4	NA	1.5	4.9	NA	NA	AM	100	17.2917	1190	114	1.85631	49.2765	Woody	20577.1	0.368119	0.38523	3.35297	1.49471	-0.165262	48.1637	10.0305	175.748	146.122	175.748	146.122	0.385211
Scrapping	https://doi.org/10.1007/s11104-011-0946-0	33.38	-81.66	Broadleaved	1.66	0.47	0.805	0.67	3515	5985	8800	3515	58.349	28.1295	70.84	23.5505	17.9	NA	NA	157.319	34.7985	122.52	4	NA	1.5	4.9	NA	NA	AM	100	17.2917	1190	114	1.85631	49.2765	Woody	20577.1	0.368119	0.38523	3.35297	1.49471	-0.165262	48.1637	10.0305	175.748	146.122	175.748	146.122	0.385211
Scrapping	https://doi.org/10.1007/s11104-011-0946-0	33.38	-81.66	Coniferous	1.5	0.815	0.737	0.545	6512	11088	7100	6512	97.68	90.3672	52.327	35.4904	17.9	NA	NA	240.374	62.1896	178.185	4	NA	1.5	4.9	NA	NA	ECM	0	17.2917	1190	114	1.85631	49.2765	Woody	20577.1	0.368119	0.38523	3.35297	1.49471	-0.165262	48.1637	10.0305	175.748	146.122	175.748	146.122	0.385211
Scrapping	https://doi.org/10.5194/bg-4-891-2007 , https://doi.org/10.1007/s00442-011-2111-0	31.333	35.05	Coniferous	0.96	0.18	1.09	0.49	1551.02	1760.38	5137.61	1551.02	14.8898	3.16869	56	7.6	NA	270	650	74.0585	7.2898	66.7687	35	300	NA	8.34	NA	NA	ECM	0	17.5708	282	626	1.09388	78	Woody	4958.5	0	0.301974	2.18803	1.29435	-0.181092	103.057	11.8807	135.322	148.758	135.322	148.758	0.301954
Scrapping	https://doi.org/10.1007/s10021-008-9126-3 , https://doi.org/10.1890/0012-9658(1997)078[1844:MLAADP]2.0.CO
Scrapping	https://doi.org/10.1007/s10021-008-9126-3 , https://doi.org/10.1890/0012-9658(1997)078[1844:MLAADP]2.0.CO
Scrapping	https://onlinelibrary.wiley.com/doi/full/10.1111/gcb.15988	44.28	-121.97	Grassland	1.36833	NA	1.372	NA	2541.5	NA	2212	NA	34.7762	NA	30.3486	NA	6.77	1618	1318	65.1248	NA	NA	NA	NA	NA	NA	NA	NA	NM/AM	50	6.4125	1618	1298	1.95548	53.3355	Non-woody	10382.2	0	0.889715	3.53818	2.07964	0.144873	162.583	29.7027	656.051	90.4181	656.051	90.4181	0.889783
Scrapping	https://onlinelibrary.wiley.com/doi/full/10.1111/gcb.15989	41.2	-101.63	Grassland	0.81075	NA	0.634333	NA	1726.62	NA	1272.33	NA	13.9986	NA	8.07084	NA	9.64	456	965	22.0694	NA	NA	NA	NA	NA	NA	NA	NA	NM/AM	50	9.75417	456	1018	1.06407	70.8258	Non-woody	4446	0.325003	0.346715	2.37669	1.2857	-0.176463	72.6634	9.1665	163.134	141.734	163.134	141.734	0.346825
Scrapping	https://onlinelibrary.wiley.com/doi/full/10.1111/gcb.15990	39.07	-96.58	Grassland	0.426333	NA	0.5095	NA	11076.7	NA	2651.75	NA	47.2235	NA	13.5107	NA	11.6	971	440	60.7342	NA	NA	NA	NA	NA	NA	NA	NA	AM	100	12.2625	889	421	1.24363	65.3437	Non-woody	10897.7	1	0.575305	2.1714	0.954272	-0.536002	182.744	31.0142	288.027	133.184	288.027	133.184	0.575409
Scrapping	https://onlinelibrary.wiley.com/doi/full/10.1111/gcb.15991	44.21	-122.13	Grassland	1.05967	NA	1.26367	NA	1898.33	NA	958.912	NA	20.116	NA	12.1175	NA	6.9	1877	1500	32.2335	NA	NA	NA	NA	NA	NA	NA	NA	NM/AM	50	6.09583	1935	1481	2.70793	51.5035	Non-woody	11819.6	0	0.906499	3.89603	2.72048	0.0853564	162.583	29.7027	684.644	88.26	684.644	88.26	0.9064
Scrapping	https://onlinelibrary.wiley.com/doi/full/10.1111/gcb.15992	34.36	-106.69	Grassland	0.78425	NA	0.865667	NA	1843.06	NA	889.054	NA	14.4542	NA	7.69625	NA	13.1	252	1600	22.1505	NA	NA	NA	NA	NA	NA	NA	NA	AM	100	13.0583	252	1593	1.22257	80.0651	Non-woody	3288.6	0	0.174896	2.31559	0.959955	-0.0463375	35.2062	4.98114	80.5461	144.749	80.5461	144.749	0.174884
Scrapping	https://onlinelibrary.wiley.com/doi/full/10.1111/gcb.15993	40.82	-104.77	Grassland	1.202	NA	1.109	NA	571.033	NA	1642.3	NA	6.86382	NA	18.2131	NA	8.95	369	1650	25.077	NA	NA	NA	NA	NA	NA	NA	NA	AM	100	9.025	369	1654	0.879452	68	Non-woody	3327.15	0	0.288362	2.35049	1.00318	-0.223487	102.951	12.3571	129.553	148.377	129.553	148.377	0.288341
Scrapping	https://onlinelibrary.wiley.com/doi/full/10.1111/gcb.15994	31.04	-97.35	Grassland	0.884	NA	1.085	NA	7238.33	NA	1979.19	NA	63.9869	NA	21.4742	NA	19.4	877	184	85.461	NA	NA	NA	NA	NA	NA	NA	NA	AM	100	19.4083	874	182	1.07055	75.4213	Non-woody	16962.9	1	0.497653	2.12822	1.25164	-0.727111	125.902	22.674	194.249	165.44	194.249	165.44	0.482048
Scrapping	https://onlinelibrary.wiley.com/doi/full/10.1111/gcb.15995	40.08	-88.83	Grassland	0.923333	NA	0.910333	NA	2971.67	NA	1554.77	NA	27.4384	NA	14.1536	NA	11.1	992	200	41.592	NA	NA	NA	NA	NA	NA	NA	NA	AM	100	10.925	990	215	0.93396	61.0924	Non-woody	10824	1	0.609993	2.28991	0.98711	NA	117.678	17.1203	287.557	141.417	287.557	141.417	0.60998
Scrapping	https://doi.org/10.1890/0012-9658(1998)079[1526:TROTPB]2.0.CO
Scrapping	10.1023/A:1022869829862 , https://doi.org/10.1139/b95-126 , https://doi.org/10.1139/x94-027	45.8333	-74.0167	Broadleaved	1.879	0.52	0.84	0.66	3610	3870	4070	3610	67.8319	20.124	34.188	23.826	3.6	1100	NA	122.144	44.0059	78.138	NA	NA	NA	NA	NA	NA	AM	100	4.84583	1060	173	1.41228	53.9506	Woody	5132.17	0	1.01488	3.19777	1.38925	NA	115.83	22.4567	578.844	117.199	578.844	117.199	1.0176
Scrapping	https://doi.org/10.1016/j.foreco.2010.06.006	3.65	113.7	Broadleaved	2.83	0.24	0.57	NA	2270	5515	1048	2270	64.241	13.236	5.9736	NA	27	2800	NA	83.4506	NA	NA	NA	NA	NA	NA	NA	NA	AM	100	26.9375	3263	47	2.39252	47	Woody	87883.5	1	0.527246	3.66182	1.15941	NA	104.499	17.7929	340.178	103.327	340.178	103.327	0.527244
Scrapping	https://doi.org/10.1890/09-0635.1 , https://doi.org/10.1007/s11104-006-9168-2 , 10.1016/s0378-1127(98)00417-4	10.4333	-83.9833	Broadleaved	2.4137	0.355	1.67	1.523	4632	2478	3252	4632	111.803	8.7969	54.3084	70.5454	25.8	3960	66.5	174.908	41.2572	267.301	NA	NA	NA	NA	NA	NA	AM	100	26.05	3724	46	0.76072	49.4695	Woody	97010.2	0.421867	0.77827	3.11018	0.929343	NA	193.6	31.4763	497.645	104.338	497.645	104.338	0.77885
Scrapping	https://doi.org/10.1007/s11104-008-9655-8 , 10.3170/2007-8-18333 , https://doi.org/10.1134/S1067413620010105	-42.65	-65.3833	Broadleaved	1.77	0.52	0.84	0.78	498	153.89	1898	498	8.8146	0.800228	15.9432	3.8844	13.7	235.9	115	25.558	4.9302	20.6278	NA	NA	NA	NA	NA	NA	AM	100	13.6375	186	115	0.842598	79	Woody	2534.25	0	0.147989	2.40783	0.88903	0.00388148	52.726	6.76428	91.4959	107.823	91.4959	107.823	0.14798
Jakub	Novak et al., 2012	50.3	16.4	Coniferous	1.1	0.29	0.68	NA	2013.1	4204.6	448.5	2013.1	22.1441	12.1933	3.0498	NA	5.1	1460	1100	37.3872	NA	NA	13	NA	NA	NA	NA	NA	ECM	0	4.13333	756	1023	0.827109	49.5014	Woody	3137.4	0	0.91775	3.06357	1.1502	0.179295	105.893	13.7769	610.796	100.171	610.796	100.171	0.91776
Jakub	Unpublished	49.2	15.7	Broadleaved	2.29	0.55	0.47	NA	300.4	1017	498.4	300.4	6.87916	5.5935	2.34248	NA	8	419	660	14.8151	NA	NA	3	NA	NA	NA	NA	NA	ECM	0	6.65	626	673	0.65835	51.9805	Woody	4162.9	0	1.04325	2.88097	1.07652	NA	132.168	20.4429	566.194	122.828	566.194	122.828	1.04317
Jakub	Novak et al., 2017	50.1	15.9	Broadleaved	1.13	0.38	0.48	NA	1879.3	23035.9	3753.4	1879.3	21.2361	87.5364	18.0163	NA	10.5	509	250	126.789	NA	NA	22	NA	NA	NA	NA	NA	ECM	0	8.55833	485	226	0.741452	69.984	Woody	4146.75	0	0.759107	2.59615	1.03059	NA	114.272	14.4109	400.025	126.617	400.025	126.617	0.759749
Jakub	https://link.springer.com/article/10.1007/s11104-021-05065-x#Tab1 10.1007/s11104-017-3231-z	47.5028	-93.4828	Coniferous	1.336	0.664	1.469	NA	315	525	1950	315	4.2084	3.486	28.6455	NA	3.3	787	413	36.3399	NA	NA	90	NA	NA	3.7	NA	NA	ECM	0	3.6125	693	423	1.0838	54.6778	Woody	2494.8	0	0.718484	3.00952	1.10707	0.10679	134.55	25.1475	379.25	126.343	379.25	126.343	0.718735
BIOor-FACE	BIFoR-FACE	52.801	-2.301	Broadleaved	3.064	0.52	0.967	1.82	3328	3499	4020	3328	101.97	18.1948	38.8734	60.5696	9	720	NA	159.038	41.4003	117.638	175	NA	NA	4.72	NA	14.3	ECM	0	8.99167	727	100	1.31185	61.582	Woody	6536.94	0.219377	0.786068	2.98866	1.37296	NA	97.4707	18.3447	501.32	104.43	501.32	104.43	0.785291
[truncated: 20 more columns]
