# Supplementary material for: Nitrogen deposition and climate drive plant nitrogen uptake while soil factors drive nitrogen use efficiency in terrestrial ecosystems
Source: Copernicus journal article supplement (doi:10.5194/esd-16-1183-2025), 2025-07-28
Supplement: Supplementary file 2 [file Table S2. Variables_correlation.xlsx]

## Sheet: Full 1 - Table S2. Variables_co
Table S2. Correlation between independent variables used in the study
	mic_N	AM_percent	Soil_ph_combi	MAT_combi	MAP_combi	Alt_combi	N_stocks_combi	noy
mic_N	1	-0.185978	-0.233737	-0.425316	-0.021282	0.119789	0.0289469	-0.263365
AM_percent	-0.185978	1	0.0184156	0.518441	0.464659	0.108439	-0.188826	-0.0183762
Soil_ph_combi	-0.233737	0.0184156	1	0.0445856	-0.516711	-0.329403	-0.125074	-0.187034
MAT_combi	-0.425316	0.518441	0.0445856	1	0.458365	-0.21797	-0.270613	0.0638213
MAP_combi	-0.021282	0.464659	-0.516711	0.458365	1	0.318139	0.0462379	-0.0340628
Alt_combi	0.119789	0.108439	-0.329403	-0.21797	0.318139	1	0.0702271	-0.0216784
N_stocks_combi	0.0289469	-0.188826	-0.125074	-0.270613	0.0462379	0.0702271	1	0.135977
noy	-0.263365	-0.0183762	-0.187034	0.0638213	-0.0340628	-0.0216784	0.135977	1
