# Supplementary material for: Nitrogen deposition and climate drive plant nitrogen uptake while soil factors drive nitrogen use efficiency in terrestrial ecosystems
Source: Copernicus journal article supplement (doi:10.5194/esd-16-1183-2025), 2025-07-28
Supplement: Supplementary file 3 [file Table S3. ESA-LC reclass.xlsx]

## Sheet: Full 1 - Table S3. ESA-LC recla
Table S3. Thesaurus key for the reclassification in the land cover map
NB_LAB	LCCOwnLabel	Natural environment	wood/grass
0	No data	N	NA
10	Cropland, rainfed	N	NA
11	Herbaceous cover	Y	G
12	Tree or shrub cover	Y	W
20	Cropland, irrigated or post-flooding	N	NA
30	Mosaic cropland (>50%) / natural vegetation (tree, shrub, herbaceous cover) (<50%)	N	NA
40	Mosaic natural vegetation (tree, shrub, herbaceous cover) (>50%) / cropland (<50%)	Y	W
50	Tree cover, broadleaved, evergreen, closed to open (>15%)	Y	W
60	Tree cover, broadleaved, deciduous, closed to open (>15%)	Y	W
61	Tree cover, broadleaved, deciduous, closed (>40%)	Y	W
62	Tree cover, broadleaved, deciduous, open (15-40%)	Y	W
70	Tree cover, needleleaved, evergreen, closed to open (>15%)	Y	W
71	Tree cover, needleleaved, evergreen, closed (>40%)	Y	W
72	Tree cover, needleleaved, evergreen, open (15-40%)	Y	W
80	Tree cover, needleleaved, deciduous, closed to open (>15%)	Y	W
81	Tree cover, needleleaved, deciduous, closed (>40%)	Y	W
82	Tree cover, needleleaved, deciduous, open (15-40%)	Y	W
90	Tree cover, mixed leaf type (broadleaved and needleleaved)	Y	W
100	Mosaic tree and shrub (>50%) / herbaceous cover (<50%)	Y	W
110	Mosaic herbaceous cover (>50%) / tree and shrub (<50%)	Y	G
120	Shrubland	Y	W
121	Shrubland evergreen	Y	W
122	Shrubland deciduous	Y	W
130	Grassland	Y	G
140	Lichens and mosses	N	NA
150	Sparse vegetation (tree, shrub, herbaceous cover) (<15%)	Y	W
151	Sparse tree (<15%)	Y	W
152	Sparse shrub (<15%)	Y	W
153	Sparse herbaceous cover (<15%)	Y	G
160	Tree cover, flooded, fresh or brakish water	Y	W
170	Tree cover, flooded, saline water	Y	W
180	Shrub or herbaceous cover, flooded, fresh/saline/brakish water	Y	G
190	Urban areas	N	NA
200	Bare areas	N	NA
201	Consolidated bare areas	N	NA
202	Unconsolidated bare areas	N	NA
210	Water bodies	N	NA
220	Permanent snow and ice	N	NA
