# Supplementary material for: Nitrogen deposition and climate drive plant nitrogen uptake while soil factors drive nitrogen use efficiency in terrestrial ecosystems
Source: Copernicus journal article supplement (doi:10.5194/esd-16-1183-2025), 2025-07-28
Supplement: Supplementary file [file esd-16-1183-2025-supplement-title-page.pdf › esd-16-1183-2025-supplement-title-page.pdf]

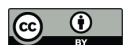

## *Supplement of*

# **Nitrogen deposition and climate drive plant nitrogen uptake while soil factors drive nitrogen use efficiency in terrestrial ecosystems**

**Helena Vallicrosa et al.**

*Correspondence to:* Helena Vallicrosa ([helena.vallicrosa@gmail.com](mailto:helena.vallicrosa@gmail.com))

- [esd-16-1183-2025-supplement-title-page.pdf](#)
- [SupFigures.pdf](#)
- [Table S1. GapFilled\\_db\\_lats\\_ratios\\_ndep.numbers](#)
- [Table S1.xlsx](#)
- [Table S2. Variables\\_correlation.xlsx](#)
- [Table S3. ESA-LC reclass.xlsx](#)

The copyright of individual parts of the supplement might differ from the article licence.
